# Supplementary material for: The Use of a Barley-Based Well to Define Cationic Betaglucan to Study Mammalian Cell Toxicity Associated with Interactions with Biological Structures
Source: MDPI journal article supplement (doi:10.3390/pharmaceutics15072009), 2023-07-23
Supplement: s1 [file s1]

Supplement

# The Use of a Barley-Based Well to Define Cationic Betaglucan to Study Mammalian Cell Toxicity Associated with Interactions with Biological Structures

Malgorzata Tymecka <sup>1,2</sup>, Katarzyna Hac-Wydro <sup>2</sup>, Magdalena Obloza <sup>2</sup> and Piotr Bonarek <sup>3</sup>  
and Kamil Kaminski <sup>2,\*</sup>

<sup>1</sup> Doctoral School of Exact and Natural Sciences, Faculty of Chemistry, Jagiellonian University, Gronostajowa 2, 30-387 Kraków, Poland; m.tymecka@doctoral.uj.edu.pl

<sup>2</sup> Faculty of Chemistry, Jagiellonian University, Gronostajowa 2, 30-387 Kraków, Poland; katarzyna.hac-wydro@uj.edu.pl (K.H.-W.); m.obloza@uj.edu.pl (M.O.)

<sup>3</sup> Department of Physical Biochemistry, Faculty of Biochemistry, Biophysics and Biotechnology, Jagiellonian University, Gronostajowa 7, 30-387 Krakow, Poland; piotr.bonarek@uj.edu.pl

\* Correspondence: kaminski@chemia.uj.edu.pl

**Table S1.** Combustion elemental analysis of obtained polymers.

| Name              | Elemental composition % |              |             |
|-------------------|-------------------------|--------------|-------------|
|                   | N                       | C            | H           |
| <b>Betaglucan</b> | 1.77 ± 0.07             | 40.82 ± 0.58 | 6.19 ± 0.03 |
| <b>BBGGTMAC3</b>  | 4.44 ± 0.02             | 45.15 ± 0.01 | 7.52 ± 0.04 |
| <b>BBGGTMAC2</b>  | 3.59 ± 0.03             | 40.57 ± 0.02 | 7.55 ± 0.12 |
| <b>BBGGTMAC1</b>  | 2.92 ± 0.04             | 41.41 ± 0.21 | 7.18 ± 0.06 |

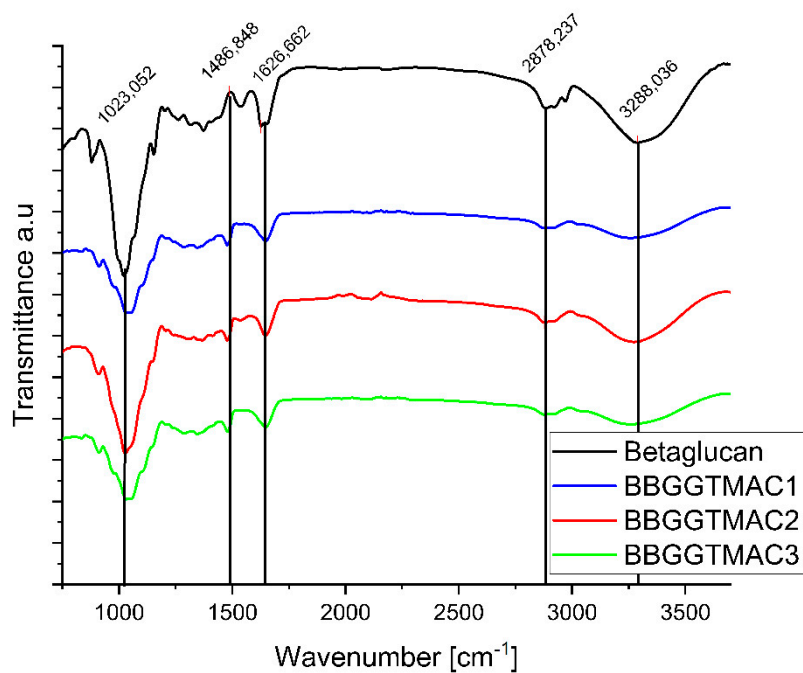

| Wavenumber [cm <sup>-1</sup> ] | Functional groups                    |
|--------------------------------|--------------------------------------|
| 1023,052                       | -CO stretching                       |
| 1486,848                       | -CH <sub>3</sub> from cationic group |
| 1626,662                       | -NH bending                          |
| 2878,237                       | -CH stretching                       |
| 3288,036                       | -OH stretching                       |

**Figure S1.** IR spectra of the obtained polycations with marked peaks and functional groups

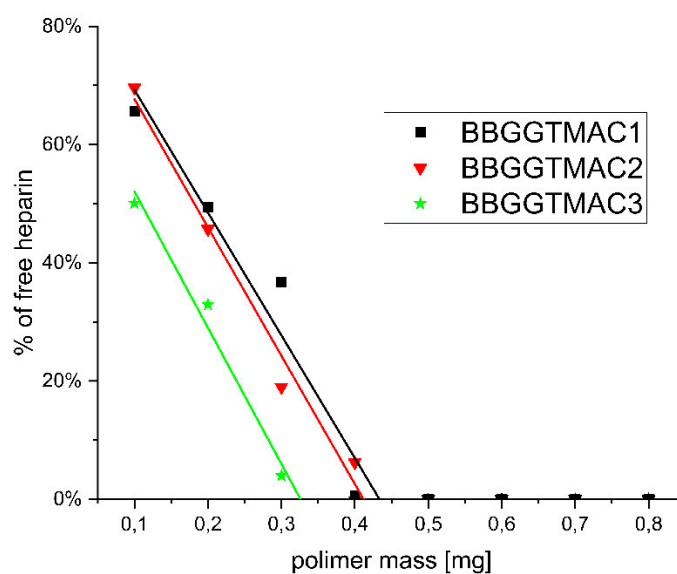

Figure S2. Dependence of unbound % heparin on polymer in solution

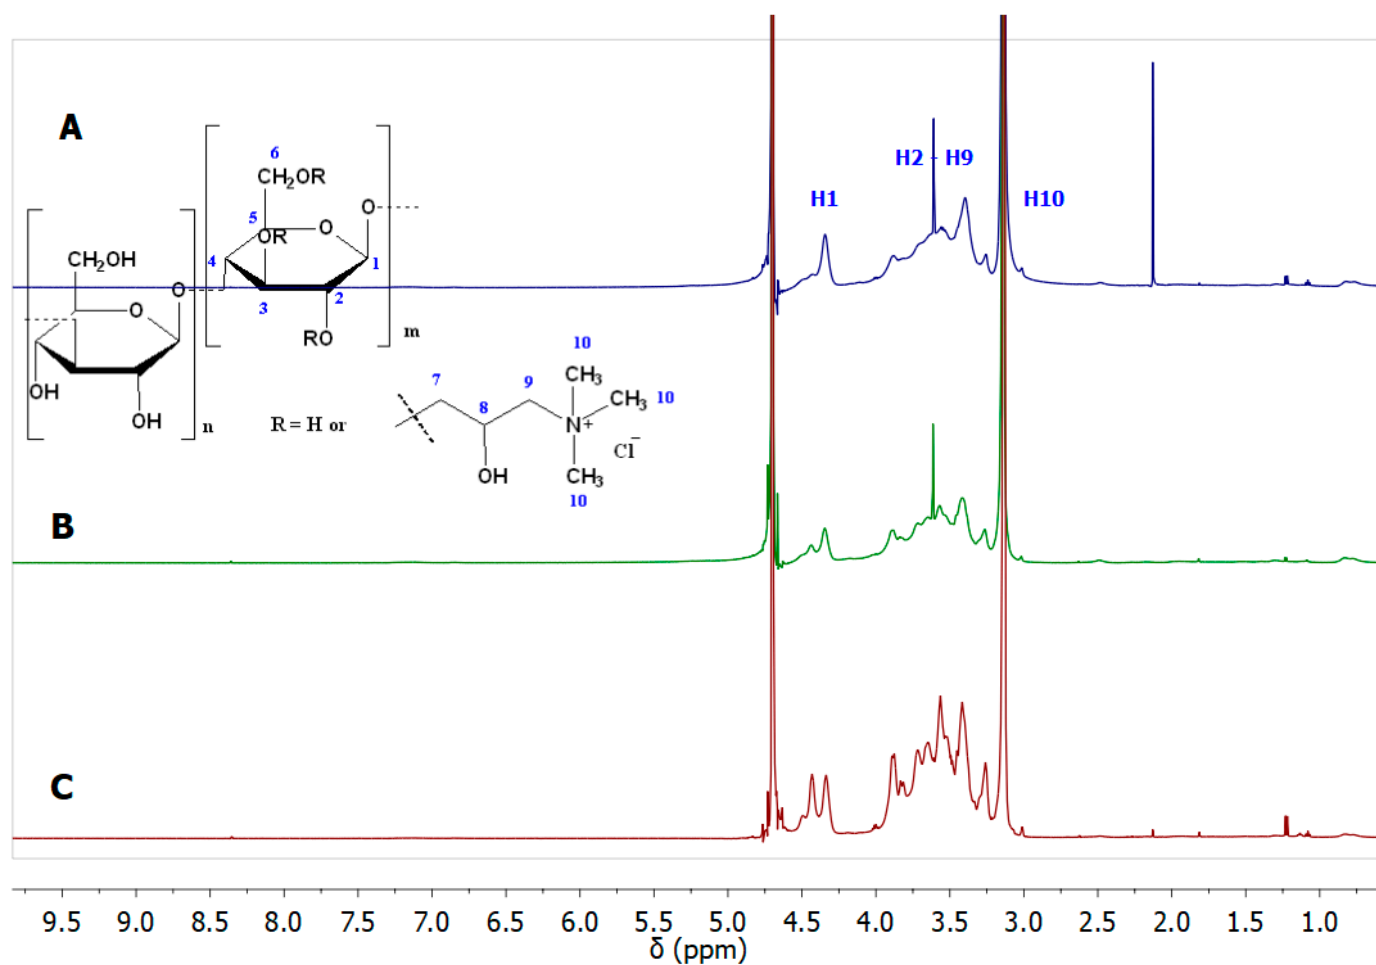

Figure S3. <sup>1</sup>H NMR spectrum of BBGGTMAC1, BBGGTMAC2 and BBGGTMAC3 in D<sub>2</sub>O.

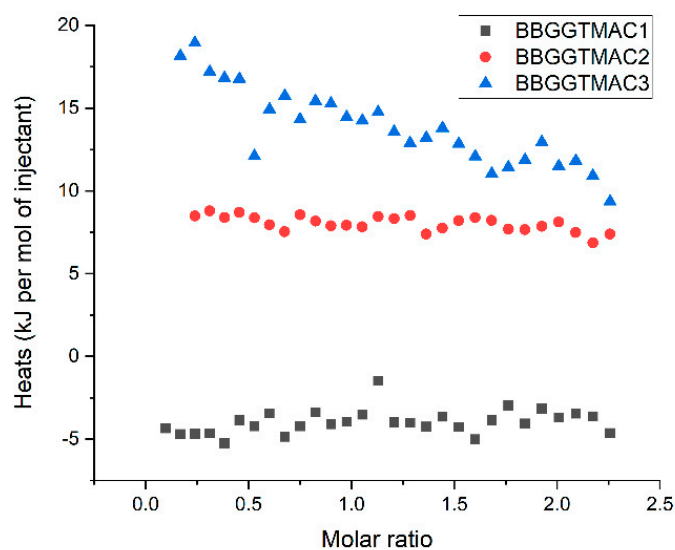

**Figure S4.** Calorimetric titrations of 200  $\mu$ M polycations solutions into 20  $\mu$ M BSA solution after subtraction of the dilution heats. Experiments were performed in PBS at 37°C.

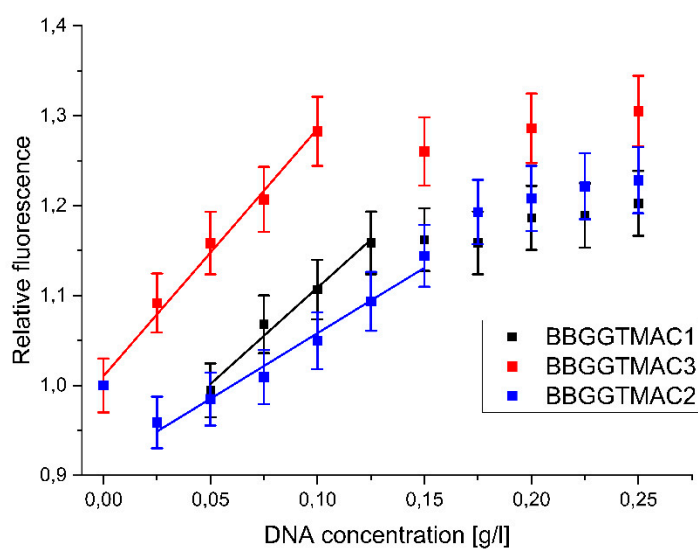

**Figure S5.** Change in fluorescence spectra of polycations with addition of DNA (polycation concentration 0,05 g/l).

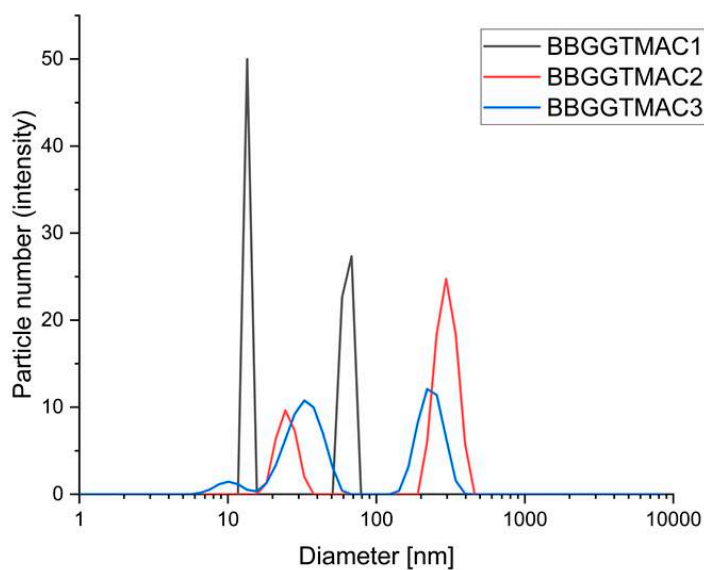

**Figure S6.** Particle size distribution of polycations.

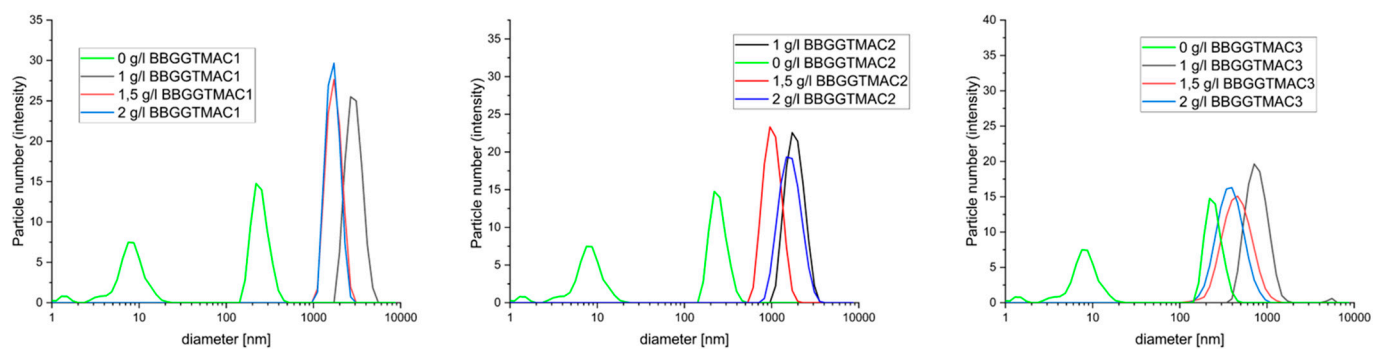

**Figure S7.** The diameters of the objects formed based on dynamic light scattering in result of the interaction of polymers with DNA, from left to right BBGGTMAC1, BBGGTMAC2, BBGGTMAC3

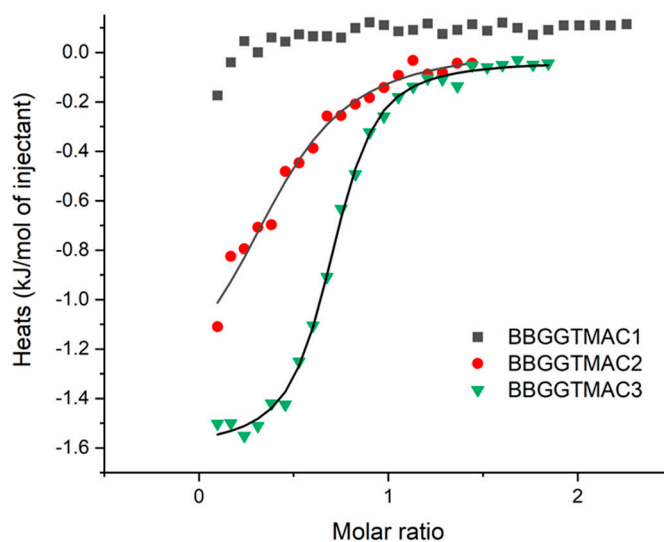

**Figure S8.** Example calorimetric titrations of 5 mM DNA solutions into 500  $\mu$ M polymers solution. Experiments were performed in PBS at 37°C. Solid lines represent the best fit of the single-site binding model to the data.

**Table S2.** Thermodynamic parameters obtained when analyzing calorimetric data of the interaction of polycations with DNA based on a single class of binding sites model.

| Name      | stoichiometry   | $K_{app}$<br>[ $\times 10^3 \text{ M}^{-1}$ ] | $\Delta H_{app}$<br>[kJ/mol] | $\Delta S_{app}$<br>[J/mol/K] |
|-----------|-----------------|-----------------------------------------------|------------------------------|-------------------------------|
| BBGGTMAC2 | $0.46 \pm 0.05$ | $14 \pm 6$                                    | $-1.5 \pm 0.3$               | $18 \pm 1$                    |
| BBGGTMAC3 | $0.66 \pm 0.05$ | $97 \pm 13$                                   | $-2.0 \pm 0.1$               | $21 \pm 0.3$                  |

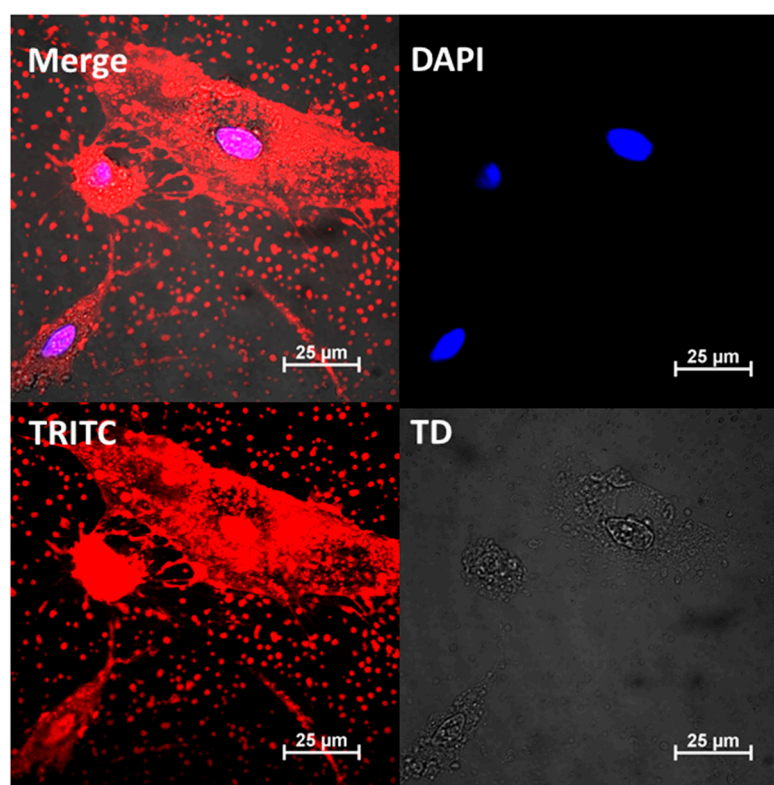

**Figure S9.** Confocal images of BBGGTMAC3.

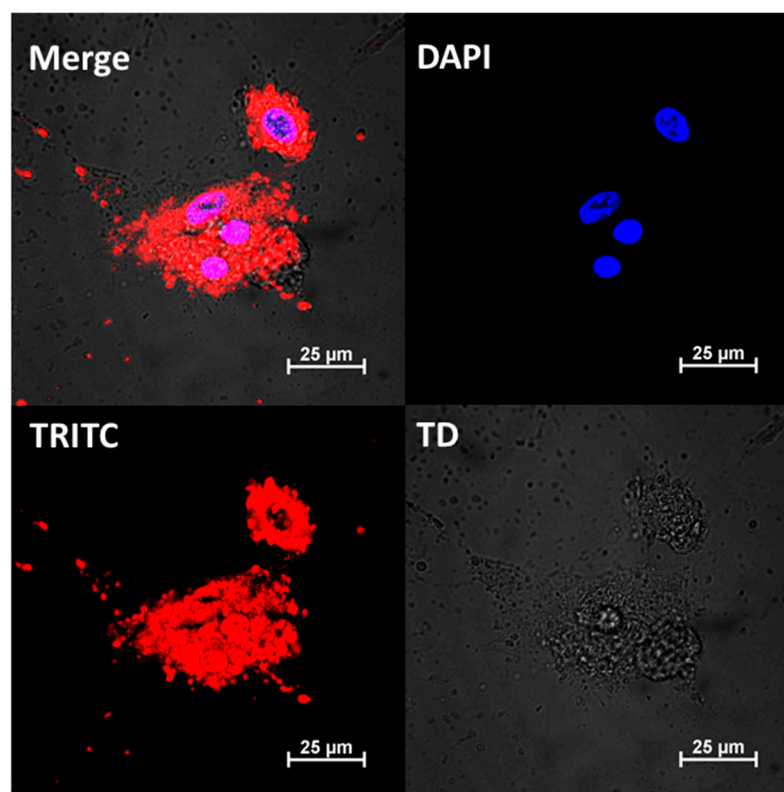

**Figure S10.** Confocal images of BBGGTMAC3 (lower concentration 50µg/ml).

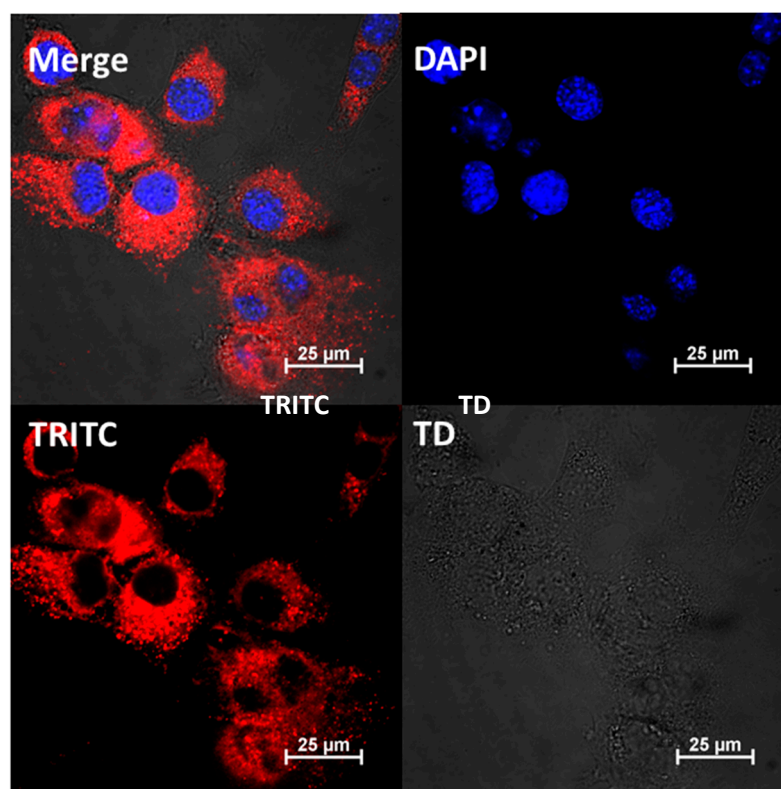

**Figure S11.** Confocal images of BBGGTMAC1.

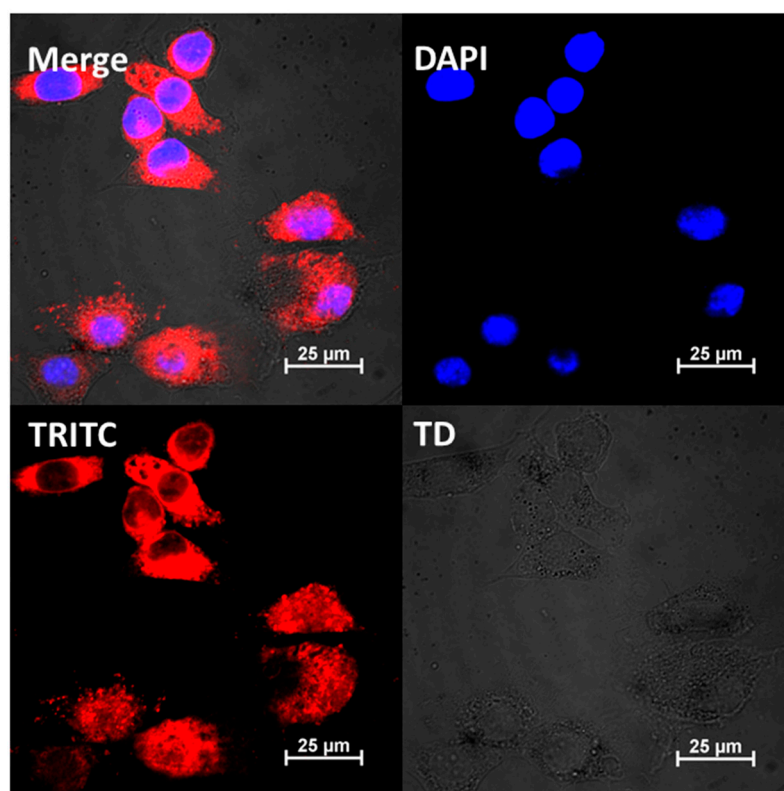

**Figure S12.** Confocal images of BBGGTMAC2

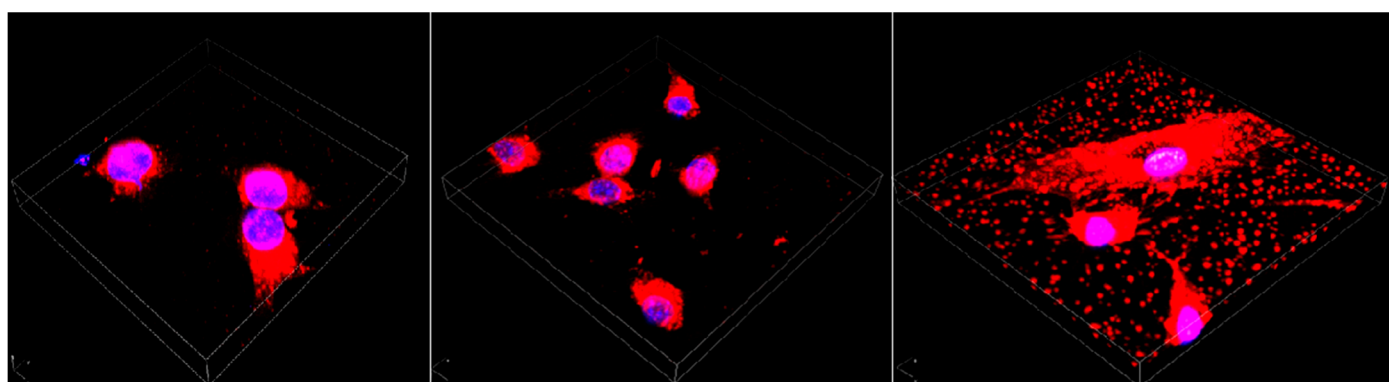

**Figure S13.** 3D Confocal images of left to right: BBGGTMAC1, BBGGTMAC2, BBGGTMAC3.



**Table S3.** Depolymerization process analysis.

| <b>Name</b>                                | <b>Time passed after the addition<br/>of betaglucanase [min]</b> | <b>Flow time [s]</b> |
|--------------------------------------------|------------------------------------------------------------------|----------------------|
| <b>Water</b>                               | -                                                                | 92                   |
| <b>BBGGTMAC2</b>                           | -                                                                | 141                  |
| <b>BBGGTMAC2 + 5 mg<br/>betaglucanase</b>  | 0                                                                | 134                  |
|                                            | 15                                                               | 130                  |
|                                            | 45                                                               | 130                  |
| <b>BBGGTMAC2 + 25 mg<br/>betaglucanase</b> | 0                                                                | 125                  |
|                                            | 15                                                               | 124                  |
|                                            | 30                                                               | 123                  |
|                                            | 45                                                               | 123                  |
